# Supplementary material
Source: PubMed Central journal article supplement (PMC11071793)

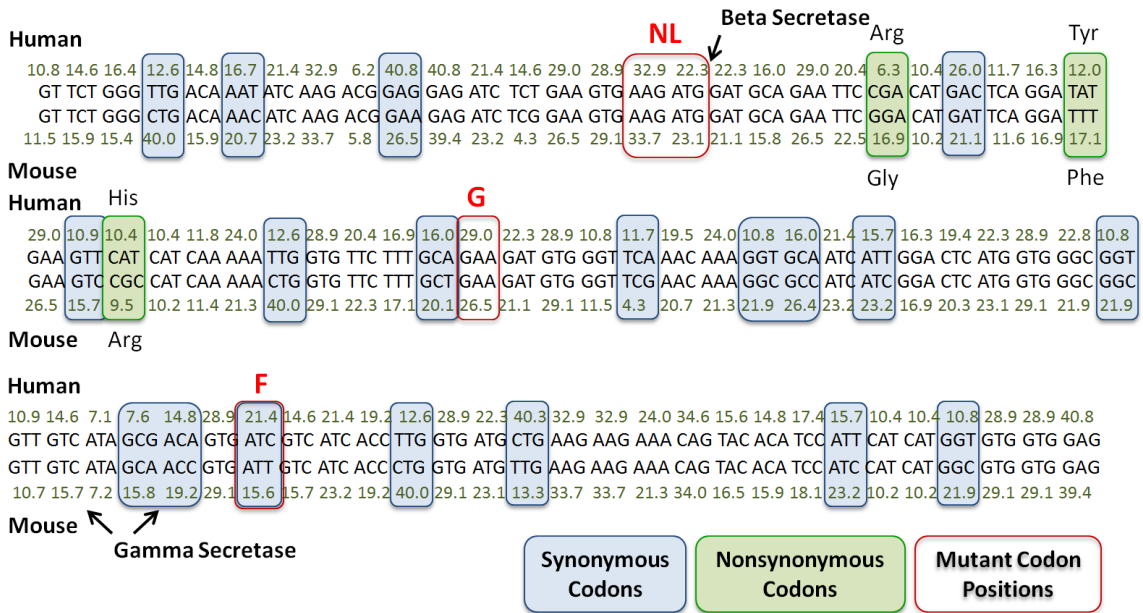

Suppl. Fig. 1

**a**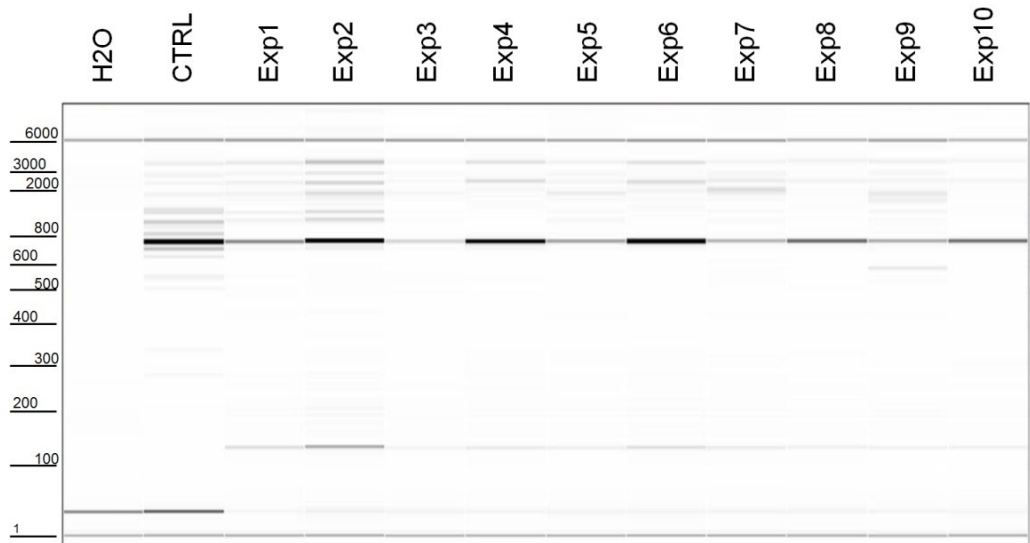**b**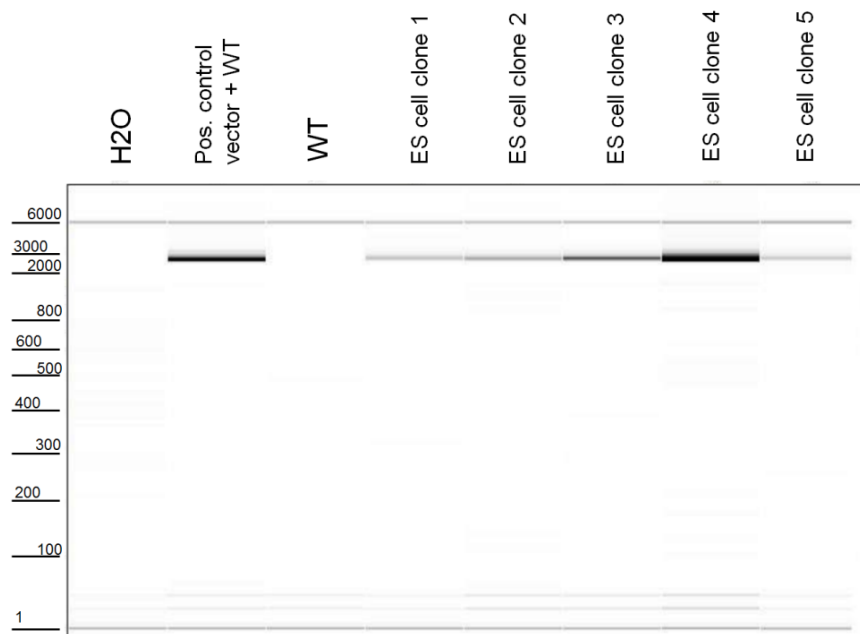**c**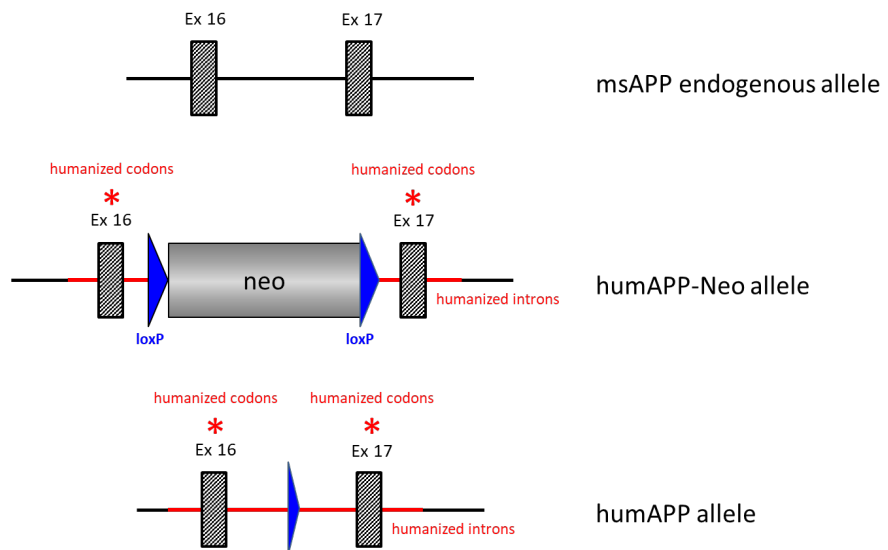

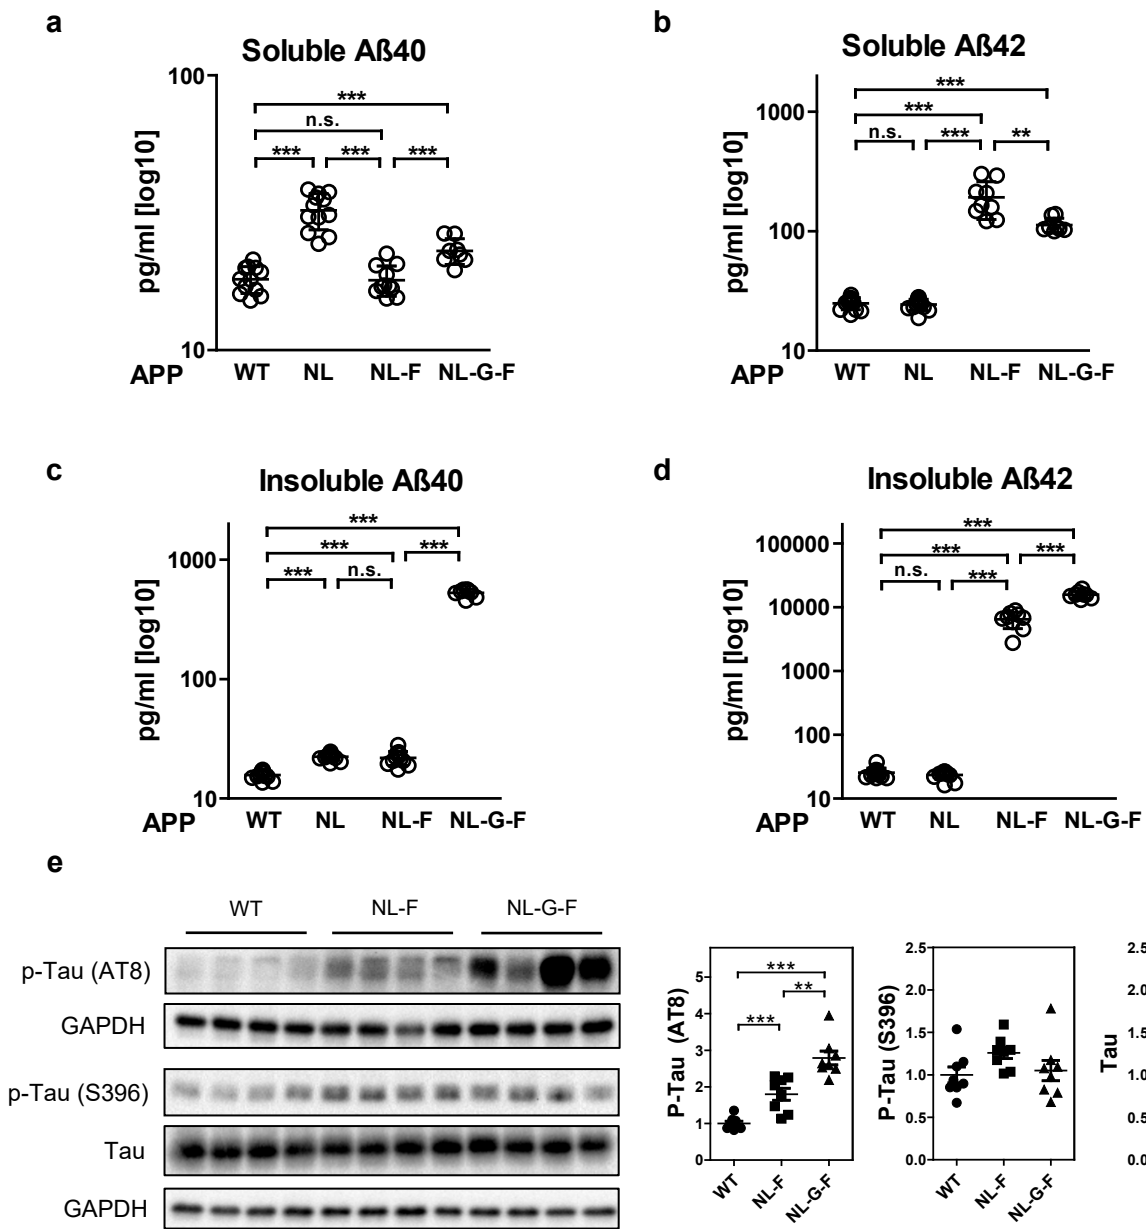

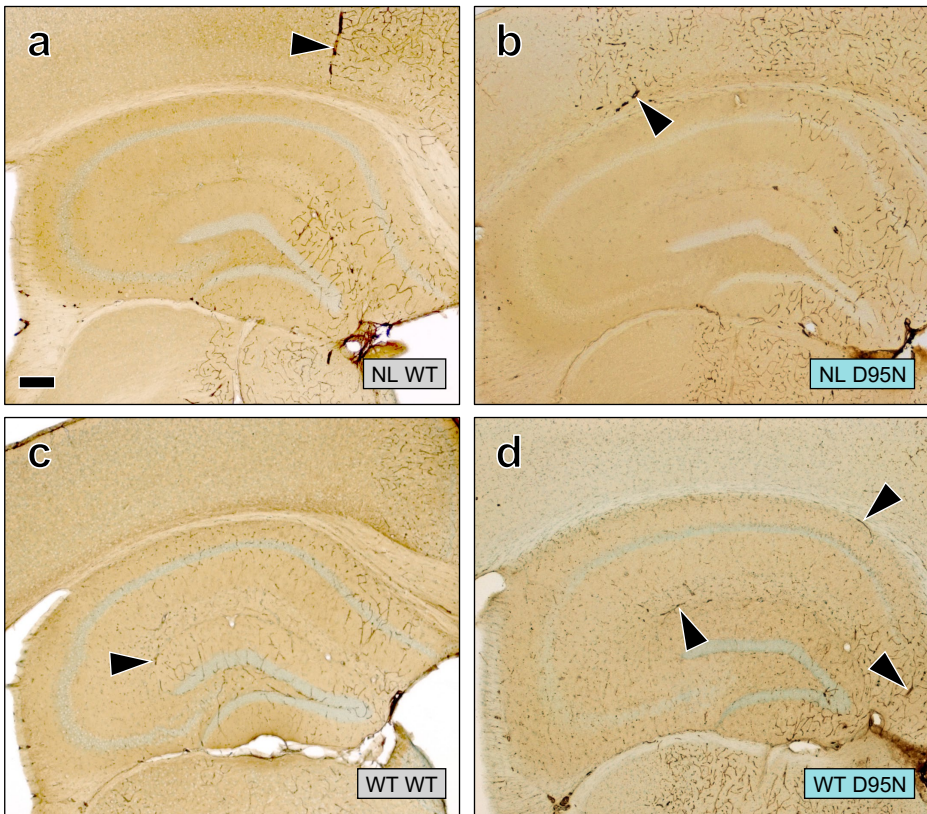

# Supplementary Figure 5

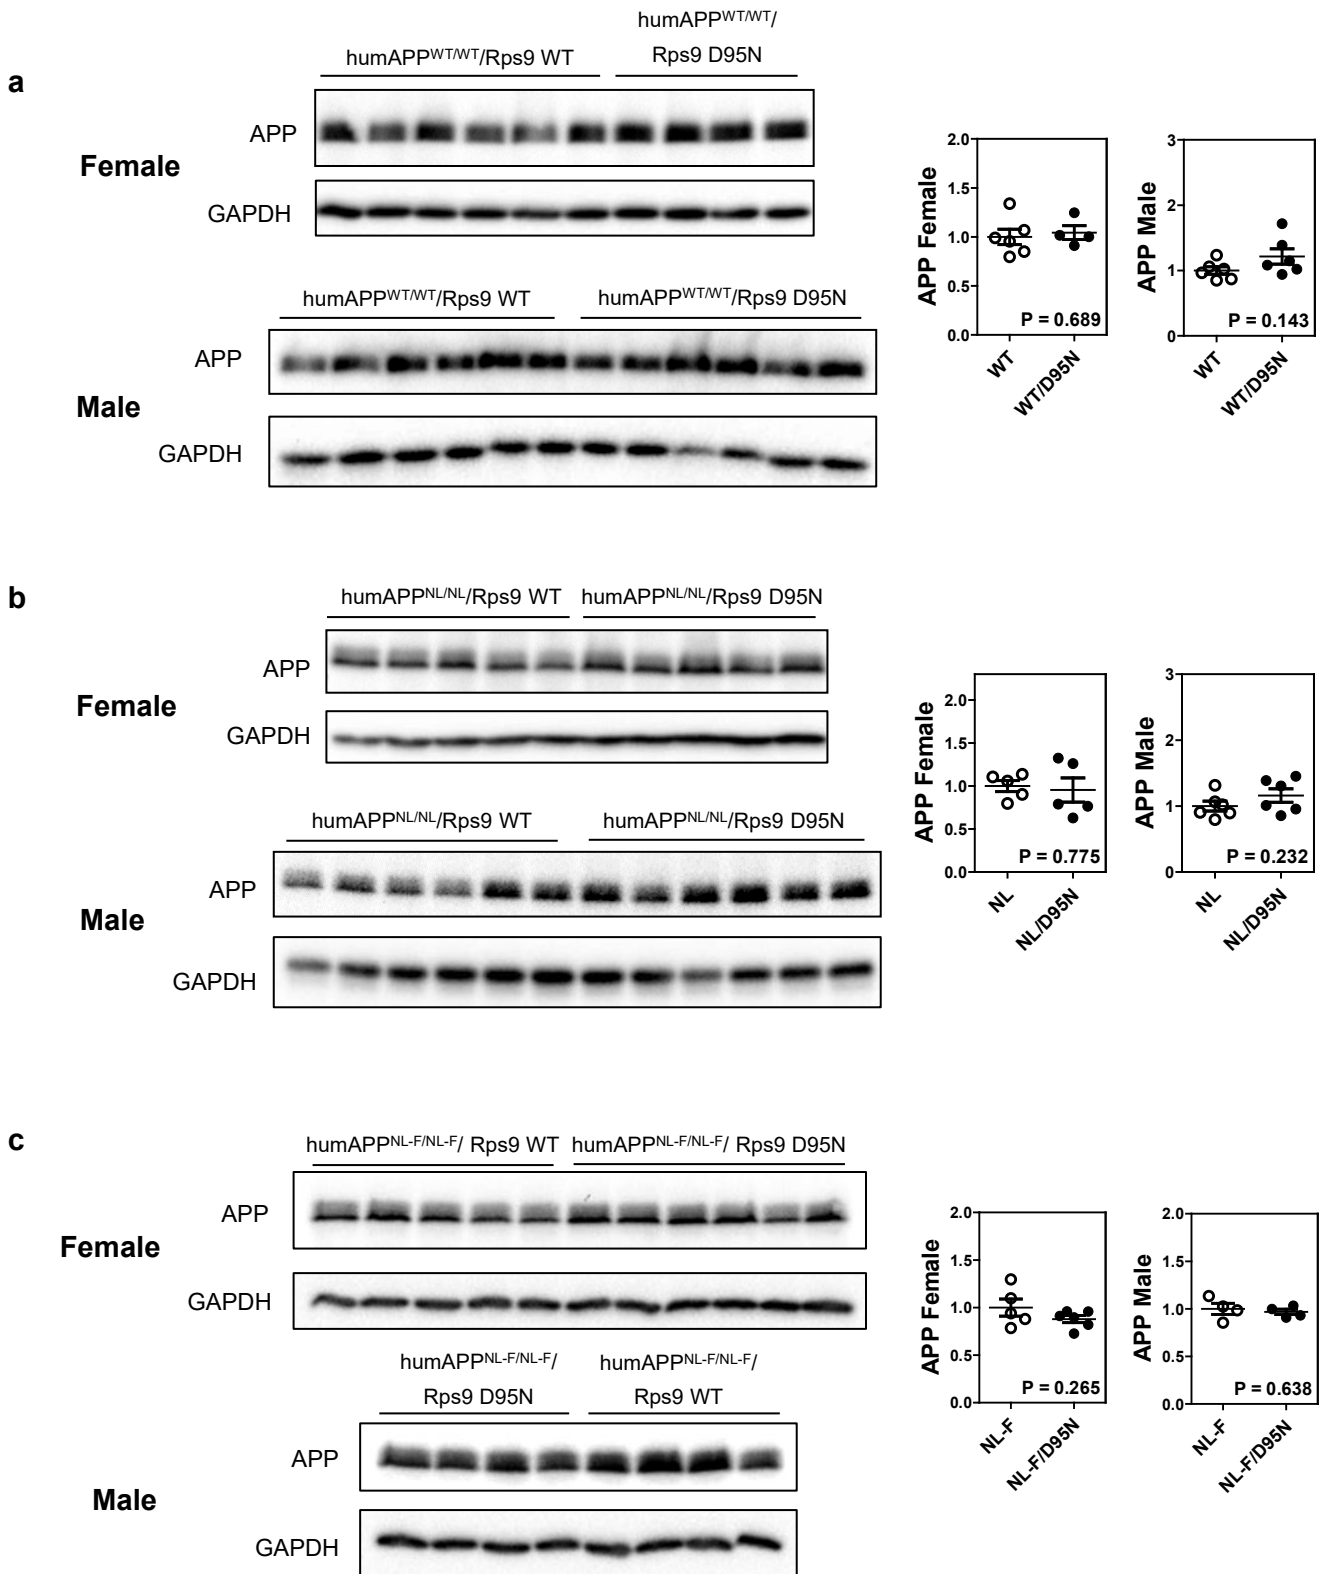

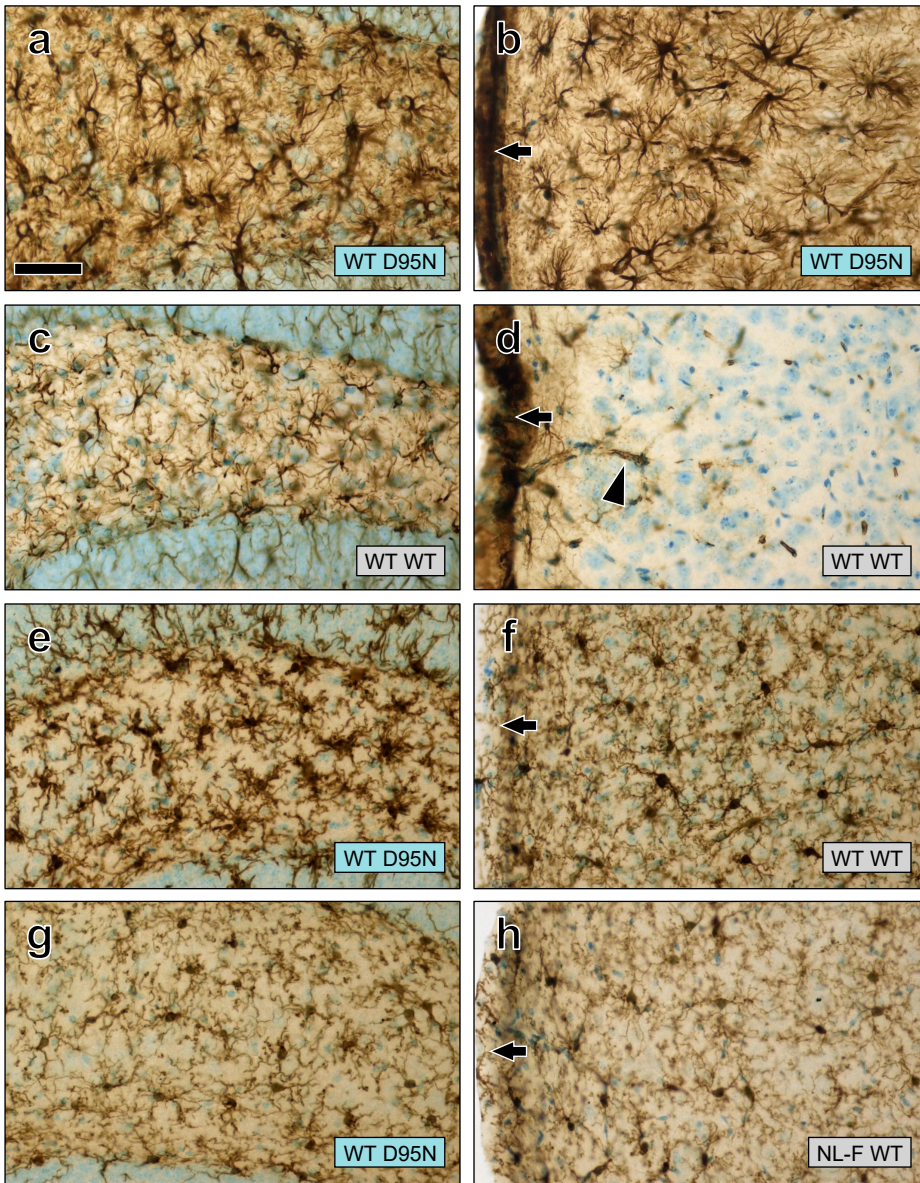

Suppl. Fig. 6

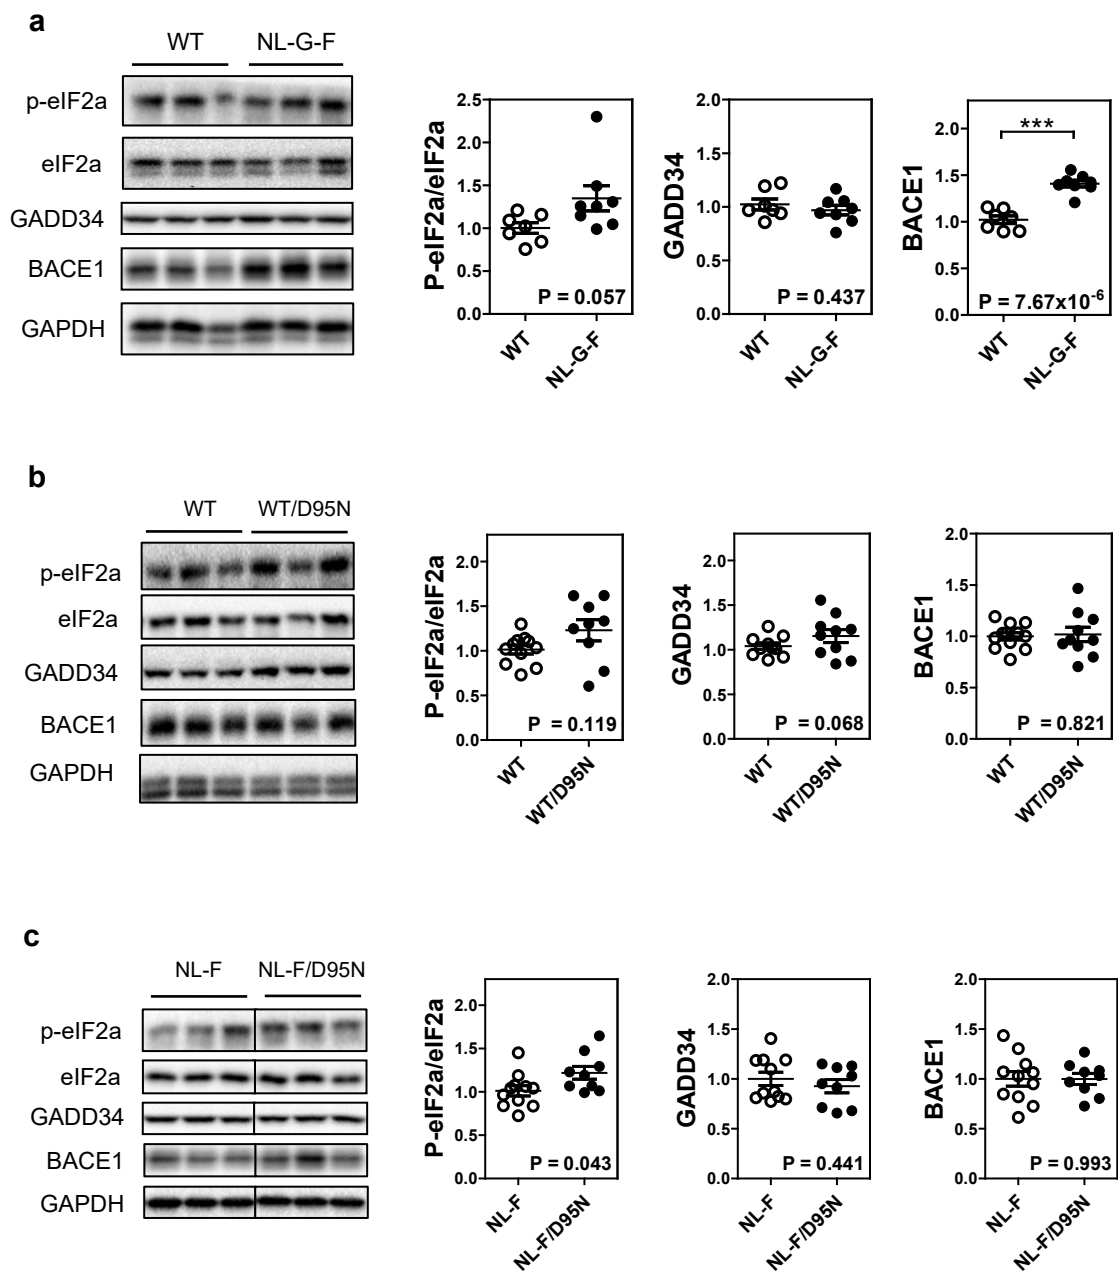

Supplement: 18_2023_5031_MOESM1_ESM.pdf [file 18_2023_5031_MOESM1_ESM.pdf]
